1 Respiratory Syncytial Virus (RSV) RNA in wastewater settled solids reflects RSV clinical positivity rates

2

3 Bridgette Hughes<sup>1</sup>, Dorothea Duong<sup>1</sup>, Bradley J. White<sup>1</sup>, Krista R. Wigginton<sup>2</sup>, Elana M. G. Chan<sup>3</sup>, Marlene  
4 K. Wolfe<sup>4</sup>, Alexandria B. Boehm<sup>3\*</sup>

5

6 1. Verily Life Sciences, South San Francisco, CA, USA, 94080

7 2. Department of Civil & Environmental Engineering, University of Michigan, Ann Arbor, MI, USA, 48109

8 3. Department of Civil & Environmental Engineering, Stanford University, 473 Via Ortega, Stanford, CA,  
9 USA, 94305

10 4. Gangarosa Department of Environmental Health, Rollins School of Public Health, Emory University,  
11 1518 Clifton Rd, Atlanta, GA, USA, 30322

12

13

14

15 \* Corresponding author: [aboehm@stanford.edu](mailto:aboehm@stanford.edu)

16

17  
18  
19  
20  
21  
22  
23

## Graphical Abstract

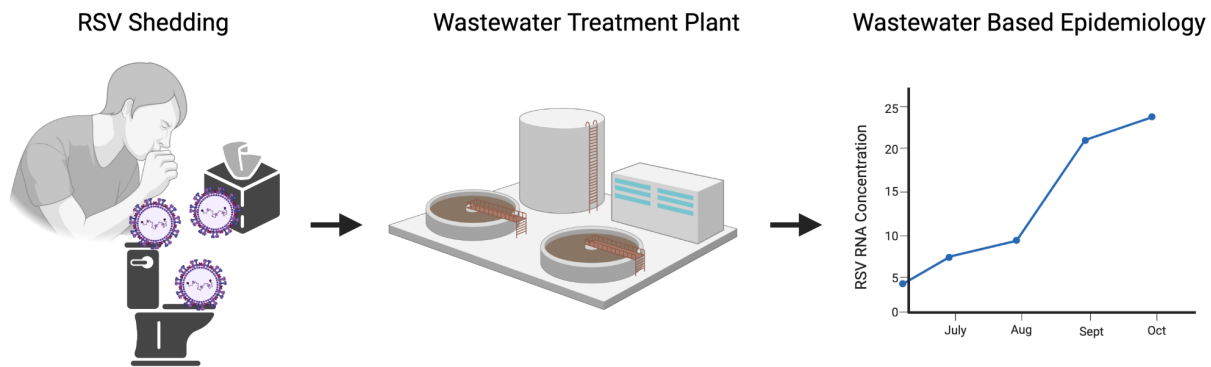

24  
25  
26  
27  
28  
29  
30  
31  
32  
33  
34  
35  
36  
37  
38  
39  
40  
41  
42

## Abstract

Wastewater based epidemiology (WBE) uses concentrations of infectious agent targets in wastewater to infer infection trends in the contributing community. To date, WBE has been used to gain insight into infection trends of gastrointestinal diseases, but its application to respiratory diseases has been limited to COVID-19. Here we report Respiratory Syncytial Virus (RSV) genomic RNA can be detected in wastewater settled solids at two publicly owned treatment works (POTWs). We further show that its concentration in settled solids is strongly associated with clinical positivity rates for RSV at sentinel laboratories across the state in 2021, a year with anomalous seasonal trends in RSV disease. Given that RSV infections have similar clinical presentations to COVID-19, can be life threatening for some, and immunoprophylaxis distribution for vulnerable people is based on outbreak identification, WBE represents an important tool to augment current RSV surveillance and public health response efforts.

Keywords: RSV, Respiratory Syncytial Virus, wastewater-based epidemiology, sludge, settled solids, virus

Synopsis: Respiratory Syncytial Virus RNA concentrations in settled solids from wastewater treatment plants are associated with state-wide RSV clinical positivity rates.

43

#### 44 **Introduction**

45 Respiratory syncytial virus (RSV) is a single-stranded, - sense RNA, enveloped virus that infects the  
46 respiratory tract of humans. RSV infections are usually self-limiting in healthy individuals but can  
47 become severe, particularly for infants and immunocompromised or elderly individuals. Symptoms  
48 include congestion, dry cough, fever, and trouble breathing in severe cases. Up to 1-2% of infants under  
49 6 months with RSV are hospitalized, and RSV is responsible for up to a third of hospitalizations for acute  
50 respiratory infections (ARI) in children <5 in the United States<sup>1</sup>. RSV is reportable to public health  
51 officials in some locations in the United States, but many RSV infections are not identified because  
52 people do not require or seek care and testing is not always done when patients encounter the  
53 healthcare system. Given the similarities in presentation between COVID-19 and RSV, the challenge in  
54 obtaining data on RSV in communities, and the high risk associated with infection in infants, there is a  
55 need to better understand RSV incidence among US populations.

56

57 Wastewater-based epidemiology (WBE) is a population health monitoring approach that uses  
58 concentrations of pathogenic agents in wastewater to gain insight into infection rates in the contributing  
59 community<sup>2</sup>. Using wastewater to understand community infection rates is a passive method that has  
60 the benefit of capturing inputs from an entire community without a participation burden. WBE has been  
61 used to gain insight into community infection rates of non-enveloped viruses including poliovirus<sup>3</sup>,  
62 norovirus<sup>4</sup>, and hepatitis A<sup>5</sup>, which are excreted in stool of infected individuals and transmitted via the  
63 fecal-oral route. Widespread implementation of WBE since the beginning of the COVID-19 pandemic  
64 shows strong associations between SARS-CoV-2 RNA in wastewater influent<sup>6-8</sup> and settled solids<sup>9-11</sup> and  
65 laboratory-confirmed COVID-19 incidence rates. Although COVID-19 is primarily a respiratory disease,  
66 SARS-CoV-2 RNA is excreted in stool of those infected<sup>12-14</sup>. To date WBE has not been used to provide  
67 information on infection rates of other respiratory viral diseases such as RSV.

68

69 Population monitoring for RSV can help establish guidelines for diagnostic testing and preventative  
70 measures. RSV is a seasonal outbreak disease with infections typically peaking in October and  
71 transmission ongoing through May, however seasonality can differ across regions of the United States  
72 and from year to year<sup>15</sup>. The 2020/2021 RSV season in the United States was substantially delayed  
73 during the COVID-19 pandemic and in June 2021 the US Centers for Disease Control and Prevention  
74 issued a health advisory warning of unexpected interseasonal RSV outbreaks<sup>16</sup>. Limited RSV  
75 immunoprophylaxis products are currently available to those at high risk and administered on a monthly  
76 basis depending on both personal risk and outbreak status<sup>17</sup>. Identifying outbreaks is thus important for  
77 targeting administration of these monoclonal antibodies, and for ongoing vaccine trials for multiple  
78 promising candidates and eventually targeting vaccine administration.

79

80 To investigate whether RSV is present in stool of infected patients and thus potentially present in  
81 wastewater, we conducted a literature review (see Supporting Information (SI)). We identified two peer-  
82 reviewed papers that tested for the presence of RSV genomic RNA in stool samples. von Linstow et al.<sup>18</sup>  
83 studied 44 children admitted to a hospital over a 6 month period with an ARI caused by RSV or human  
84 metapneumovirus. They collected one stool sample at enrollment and then weekly for three weeks from  
85 each child. RSV viral RNA was detected using quantitative RT-PCR in 5 of 165 total stool samples. The  
86 five positive stool samples were obtained from five unique children with RSV infections. Shedding in  
87 stool only occurred within the first week of illness. In 2017, a case report by Akbari et al.<sup>19</sup> detected RSV  
88 RNA in stool. Three stool samples were collected from a 12-month old female presenting with acute  
89 gastroenteritis and tested for respiratory viruses and gastrointestinal bacteria using a complete

90 multiplex-PCR panel. RSV (subtype B) was present in all three stool samples. Neither study reported RSV  
91 RNA concentrations in stool, or provided detection limits for their assays.

92  
93 The goal of this study is to investigate whether RSV can be detected in wastewater and, if so, whether its  
94 concentration is associated with clinical RSV positivity rates. Previous work indicates that enveloped  
95 viruses partition to the solids in wastewater where their concentrations are enriched orders of  
96 magnitude over the liquid phase<sup>20,21</sup>. We therefore focused our analysis on wastewater solids at two  
97 publicly owned treatment works (POTWs) in a highly urbanized region of the San Francisco Bay Area,  
98 California, USA. We first designed and tested a custom digital droplet (dd-)RT-PCR assay that targets the  
99 N gene of RSV A and RSV B. We then applied the assay to settled solids collected biweekly to three days  
100 per week at the POTWs between January and mid-November 2021. The resultant concentrations are  
101 compared to the limited information publicly available on RSV infections in the State of California.

## 102 103 **Methods**

104 **Assay development for RSV.** A digital RT-PCR assay was designed to target the N gene of RSV. RSV A and  
105 RSV B genomes were downloaded from NCBI. The assay was developed *in silico* using Primer3Plus  
106 (<https://primer3plus.com/>). The parameters used in assay development (that controlled sequence  
107 length, GC content, and melt temperatures) are provided in Table S1.

108  
109 Primers and probe sequences were screened for specificity *in silico* using NCBI Blast, and then tested *in*  
110 *vitro* against a virus panel (NATtrol™ Respiratory Verification Panel NATRVP2-BIO, Zeptomatrix, Buffalo,  
111 NY) that includes several chemically inactivated intact influenza viruses, parainfluenza viruses,  
112 adenovirus, rhinovirus, metapneumovirus and several coronaviruses, and “wild-type” gRNA from SARS-  
113 CoV-2 strain 2019-nCoV/USA-WA1/2020 (ATCC® VR-1986D™). A mixture of RSV B (NATtrol™ RSV  
114 positive Control NATRSV-6C, Zeptomatrix) and RSV A (from NATtrol™ Flu Verification Panel NATFVP-  
115 NNS, Zeptomatrix) was also included as a positive control. RNA was extracted using Chemagic™ Viral  
116 DNA/RNA 300 Kit H96 for Chemagic 360 (Perkin Elmer, Waltham, MA). RNA was used undiluted as  
117 template in digital droplet PCR singleton assays. The concentration of targets used in the *in vitro*  
118 specificity testing was between 10<sup>3</sup> and 10<sup>4</sup> copies per well; each target from the respiratory panel was  
119 run in a single well, and the SARS-CoV-2 gRNA was tested in 8 wells.

120  
121 **Wastewater samples.** Two publicly owned treatment works (POTWs) that serve populations of Santa  
122 Clara County, California, USA (San José-Santa Clara Regional Wastewater Facility, RWF) and San Mateo  
123 County, California, USA (Silicon Valley Clean Water, SVCW) were included in the study. RWF and SVCW  
124 serve approximately 1,500,000 and 220,000 people, respectively; further descriptions of these POTWs  
125 can be found in Wolfe et al.<sup>22</sup>.

126  
127 Samples of approximately 50 mL of settled solids were collected by POTW staff using sterile technique in  
128 clean, labeled bottles. Grab samples were taken at SVCW. At RWF, POTW staff manually collected a 24 h  
129 composite sample<sup>21</sup>. Samples were immediately stored at 4°C, transported to the lab, and processed  
130 within 6 hours of collection.

131  
132 Samples were collected daily for a larger COVID-19 wastewater surveillance effort starting in November  
133 2020<sup>22</sup>, and a subset of these samples are used in the present study and were chosen to span the period  
134 prior to and including increasing RSV incidence in the state<sup>23</sup>. Although RSV incidence usually peaks in  
135 the winter, the 2020-2021 was an anomalous year with limited to no RSV cases and increasing cases  
136 beginning in the summer (Figure 1). One sample was analyzed every other week during January,  
137 February, and March; one sample was analyzed per week in April and May, and then three samples per

138 week were analyzed between 22 May to 12 November 2021. 90 samples from each POTW were  
139 included in the analysis for a total of 180 samples.

140  
141 RNA was extracted from the 10 replicate aliquots of dewatered settled solids as described in Wolfe et al.  
142 <sup>22,24,25</sup>. RNA was subsequently processed immediately (within 24h of sample collection) to measure  
143 concentrations of the N gene of SARS-CoV-2, pepper mild mottle virus (PMMoV), and bovine  
144 coronavirus (BCoV) recovery using digital droplet RT-PCR methods reported by Wolfe et al. <sup>22,26</sup>. PMMoV  
145 is highly abundant in human stool and wastewater globally<sup>27,28</sup> and is used here as an internal recovery  
146 and fecal strength control for the wastewater samples<sup>29</sup>. BCoV was spiked into the samples and used as  
147 an additional recovery control; all samples were required to have greater than 10% BCoV recovery.  
148 During the initial measurement, RNA extraction and PCR negative and positive controls were included to  
149 ensure no contamination as described in Wolfe et al.<sup>22</sup>. Extracted RNA samples were then stored at -  
150 80°C between 4 and 300 days before they were analyzed for the RSV N gene and SARS-CoV-2 N gene in a  
151 multiplex digital RT-PCR assay; each of the 10 replicate RNA extracted were run in its own well, and the  
152 10 wells were merged for analysis. The SARS-CoV-2 N gene was run a second time in all samples to test  
153 for RNA degradation during storage (no to minimal degradation was observed, see SI). Wastewater data  
154 and MIQE reporting details<sup>30</sup> are available publicly at the Stanford Digital Repository  
155 (<https://purl.stanford.edu/ck044th0182>); results below are reported as suggested in the EMMI  
156 guidelines<sup>31</sup>.

#### 157 158 **ddRT-PCR**

159 For the assay specificity testing, the RSV assay was challenged against target (RSV A and B) and non-  
160 target (other respiratory viruses) viral gRNA. Each PCR plate contained positive controls and negative  
161 PCR no template controls (NTC). PCR positive controls for each target assayed on the plate were run in 8  
162 wells, and NTC were run in 8 wells. Positive controls for the assays consisted of a mixture of RSV A and B  
163 gRNA.

164  
165 The ddRT-PCR methods applied to wastewater solids to measure the SARS-CoV-2 N gene, PMMoV, and  
166 BCoV are provided in detail elsewhere, including details relating to EMMI<sup>31</sup> guidelines and are not  
167 repeated here<sup>22</sup>. Here, we provide methods for the multiplexed SARS-CoV-2 N and RSV N gene assays  
168 which have not been reported previously. For this multiplexed assay, ddRT-PCR was performed on 20  $\mu$ l  
169 samples from a 22  $\mu$ l reaction volume, prepared using 5.5  $\mu$ l template, mixed with 5.5  $\mu$ l of One-Step RT-  
170 ddPCR Advanced Kit for Probes (Bio-Rad 1863021), 2.2  $\mu$ l Reverse Transcriptase, 1.1  $\mu$ l DTT and primers  
171 and probes at a final concentration of 900 nM and 250 nM respectively. Primer and probes for the RSV A  
172 & B N gene were purchased from Integrated DNA Technologies (IDT, San Diego, CA) (Forward primer:  
173 CTCCAGAATAYAGGCATGAYTCTCC, Reverse Primer: GCYCTYCTAATYACWGCTGTAAGAC, Probe:  
174 TAACCAAATTAGCAGCAGGAGATAGATCAG (5' HEX/ZEN/3' IBFQ)).

175  
176 Droplets were generated using the AutoDG Automated Droplet Generator (Bio-Rad, Hercules, CA). PCR  
177 was performed using Mastercycler Pro (Eppendorf, Enfield, CT) with with the following cycling  
178 conditions: reverse transcription at 50°C for 60 minutes, enzyme activation at 95°C for 5 minutes, 40  
179 cycles of denaturation at 95°C for 30 seconds and annealing and extension at 61°C for 30 seconds,  
180 enzyme deactivation at 98°C for 10 minutes then an indefinite hold at 4°C. The ramp rate for  
181 temperature changes were set to 2°C/second and the final hold at 4°C was performed for a minimum of  
182 30 minutes to allow the droplets to stabilize. Droplets were analyzed using the QX200 Droplet Reader  
183 (Bio-Rad). A well had to have over 10,000 droplets for inclusion in the analysis. All liquid transfers were  
184 performed using the Agilent Bravo (Agilent Technologies, Santa Clara, CA).

185

186 Thresholding was done using QuantaSoft™ Analysis Pro Software (Bio-Rad, version 1.0.596). In order for  
187 a sample to be recorded as positive, it had to have at least 3 positive droplets. Each wastewater sample  
188 was run in 10 replicate wells, and each 96-well PCR plate of wastewater samples included PCR positive  
189 controls for each target assayed on the plate in 1 well, PCR NTCs in two wells, extraction negative  
190 controls (where no sample was added to the extraction kit) in two wells, and one extraction positive  
191 control (containing SARS-CoV-2 gRNA) in one well. PCR positive controls consisted of gRNA of SARS-CoV-  
192 2 (strain 2019-nCoV/USA-WA1/2020, ATCC® VR-1986D™) and RSV B and A gRNA (NATRSV-6C and RSV A  
193 from NATtrol™ Flu Verification Panel, Zeptomatrix).

194  
195 Results from replicate wells were merged for analysis. Thresholding was done using QuantaSoft™  
196 Analysis Pro Software (Bio-Rad, version 1.0.596). In order for a sample to be recorded as positive, it had  
197 to have at least 3 positive droplets. For the wastewater samples, three positive droplets corresponds to  
198 a concentration between ~500-1000 cp/g; the range in values is a result of the range in the equivalent  
199 mass of dry solids added to the wells.

200  
201 For the wastewater samples, concentrations of RNA targets were converted to concentrations per dry  
202 weight of solids in units of copies/g dry weight using dimensional analysis. The dry weight of the  
203 dewatered solids was determined by drying<sup>25</sup>. The total error is reported as standard deviations and  
204 includes the errors associated with the Poisson distribution and the variability among the 10 replicates.

205 A

206  
207 **Clinical data in RSV.** The weekly fraction of samples positive for RSV (hereafter “RSV positivity rate”)  
208 from sentinel laboratories in the State of California are publicly available from the California Department  
209 of Public Health website  
210 (<https://www.cdph.ca.gov/Programs/CID/DCDC/Pages/Immunization/Influenza.aspx>)<sup>23</sup>. Sentinel  
211 laboratories are hospital, academic, and private laboratories, and public health laboratories in the  
212 Respiratory Laboratory Network situated throughout California.

213  
214 **Statistical analysis.** RSV N gene concentrations were compared between POTWs using Kendall’s tau and  
215 Wilcoxon Sign Tests as data were not normally distributed (Shapiro-Wilk normality test,  $p < 0.05$ ). Weekly  
216 average RSV N gene concentrations and weekly average RSV N gene concentrations normalized by  
217 PMMoV were calculated for each week of 2021 through 12 Nov 2021 to match the frequency of RSV  
218 positivity rate reporting; the weekly average was calculated using all available data (between 1 and 3  
219 data points). We tested the null hypothesis that weekly average wastewater concentrations were not  
220 associated with weekly positivity rates from sentinel laboratories using Kendall’s tau. We used linear  
221 regression to determine the rate of change of RSV positivity with RSV wastewater concentrations.  
222 Measurements below the detection limit were replaced with 500 copies/g (the approximate detection  
223 limit). All statistical analyses were implemented in R studio (version 1.4.1106).

## 224 225 **Results and Discussion**

226 **RSV Assay specificity.** In silico analysis indicated no cross reactivity between the RSV assay and  
227 deposited sequences in NCBI. When challenged against the respiratory virus panel and SARS-CoV-2  
228 gRNA no cross reactivity was observed; and the assay amplified gRNA from both RSV A and RSV B.  
229 Positive controls and NTCs run on the sample plate were positive and negative. These results suggest  
230 that the RSV ddRT-PCR assay is specific to both RSV subtypes.

231  
232 **RSV RNA concentrations in wastewater solids.** All positive and negative controls were positive and  
233 negative respectively, indicating assays performed well and without contamination. BCoV recoveries



234 were higher than 10% and PMMoV concentrations within the expected range for the POTW suggesting  
235 an efficient and acceptable recovery of RNA during RNA extraction (Figure S1).

236  
237 Concentrations of the RSV N gene in wastewater solids ranged from non-detect to  $6.2 \times 10^4$  copies/g dry  
238 weight. At both POTWs RSV levels were non-detect until late June at which time concentrations began  
239 to increase through the last sample collected in mid-November (Figure 1). Concentrations of RSV RNA  
240 were positively and significantly correlated at the two POTW (Kendall's tau = 0.52,  $p < 10^{-12}$ ). Paired,  $\log_{10}$ -  
241 transformed concentrations were not different between POTWs (paired, Wilcoxon signed rank test  $V =$   
242 988,  $p = 0.9385$ ,  $N = 90$ ). Given the close proximity of the POTWs (located 40 km from each other), the  
243 similar concentrations may suggest similar RSV infection rates in their sewersheds.

244  
245 The temporal trend in RSV RNA concentrations in settled solids mirrors state-wide trends in RSV  
246 positivity rate, identifying an infection pattern that differs from usual seasonal trends. Weekly averaged  
247 RSV RNA concentrations at each POTW were strongly correlated with the weekly positivity rate (tau =  
248 0.77,  $p < 10^{-10}$  for RWF, tau = 0.65,  $p < 10^{-7}$  for SVCW,  $N = 39$ ). We repeated the analysis normalizing RSV  
249 RNA concentrations by PMMoV and found similar results. Normalizing by PMMoV can serve to correct  
250 for sample-to-sample changes in RNA extraction efficiency, concentrations during storage, or differences  
251 in the fecal strength of the wastewater<sup>22,32</sup> (Figure S2). A 1  $\log_{10}$  increase in RSV RNA is associated with  
252 an 0.08 (RWF) and 0.05 (SVCW) increase in RSV positivity rate ( $r^2 = 0.89$ ,  $p < 10^{-15}$  for RWF;  $r^2 = 0.70$ ,  $p$   
253  $< 10^{-10}$  for SVCW,  $N = 39$ ) (Figure 2). The results are unchanged if the RSV concentrations are normalized  
254 by PMMoV.

255  
256 Concentrations of RSV RNA in wastewater solids reported are similar to concentrations of SARS-CoV-2  
257 RNA in wastewater solids when laboratory-confirmed COVID-19 incidence rates are between 1/100,000  
258 and 10/100,000<sup>22</sup>. The positivity rates used herein were calculated using data from sentinel laboratories  
259 through the state rather than from the sewershed areas, and thus do not provide direct information on  
260 population incidence rates. Additional work to compile RSV incidence data in the sewersheds may allow  
261 for estimates of disease burden associated with RSV in wastewater beyond outbreak identification and  
262 trends. Understanding how RSV RNA in wastewater relates to incidence rates will also require a better  
263 understanding of RSV shedding from infected individuals. In particular, there is no quantitative data on  
264 RSV RNA concentrations in stool of infected patients and the potential for sputum or other bodily  
265 secretions to contribute RSV RNA to wastewater should be considered.

266  
267 The consistent detection of RSV in wastewater beginning during a known outbreak and strong  
268 associations between RSV RNA concentrations at the POTWs and state-wide trends in positivity rates at  
269 sentinel laboratories supports the idea that RSV RNA concentrations can be used to identify outbreaks  
270 and infer infection trends within contributing populations. Wastewater surveillance may be especially  
271 useful for diseases like RSV where clinical surveillance is challenging, yet tracking of outbreaks is  
272 required to initiate public health response. Wastewater concentrations may allow insight into when  
273 infection rates begin to rise, and may be especially useful for identifying unusual season trends in  
274 diseases like that observed for RSV in 2021. This work suggests that regular monitoring for RSV in  
275 wastewater can be useful to identify and target response to outbreaks. Success in monitoring for both  
276 COVID-19 and RSV suggests that additional efforts should be made towards wastewater monitoring for  
277 existing and novel enveloped respiratory viruses.

278  
279  
280 **Acknowledgements.** This work was funded by a gift from the CDC Foundation. We acknowledge the  
281 following individuals for assistance with wastewater solids collection: Payal Sarkar (RWF), Noel Enoki

282 (RWF), and Amy Wong (RWF), Maria Gawat (SVCW), Tiffany Ishaya (SVCW), and Eric Hansen (SVCW).  
283 Graphical abstract Created with BioRender.com.

284

285

286 **Supporting Information.** Additional methods, Tables S1 and S2 show primer design criteria and  
287 systematic review process, and Figures S1 and S2 show PMMoV results and RSV normalized by PMMoV,  
288 respectively.

289

290



291 References

- 292
- 293 (1) Rha, B.; Curns, A. T.; Lively, J. Y.; Campbell, A. P.; Englund, J. A.; Boom, J. A.; Azimi, P.  
294 H.; Weinberg, G. A.; Staat, M. A.; Selvarangan, R.; Halasa, N. B.; McNeal, M. M.; Klein, E.  
295 J.; Harrison, C. J.; Williams, J. V.; Szilagyi, P. G.; Singer, M. N.; Sahni, L. C.; Figueroa-  
296 Downing, D.; McDaniel, D.; Prill, M. M.; Whitaker, B. L.; Stewart, L. S.; Schuster, J. E.;  
297 Pahud, B. A.; Weddle, G.; Avadhanula, V.; Munoz, F. M.; Piedra, P. A.; Payne, D. C.;  
298 Langley, G.; Gerber, S. I. Respiratory Syncytial Virus-Associated Hospitalizations Among  
299 Young Children: 2015-2016. *Pediatrics* **2020**, *146* (1), e20193611.  
300 <https://doi.org/10.1542/peds.2019-3611>.
- 301 (2) Sinclair, R. G.; Choi, C. Y.; Riley, M. R.; Gerba, C. P. Chapter 9 - Pathogen Surveillance  
302 Through Monitoring of Sewer Systems. In *Advances in Applied Microbiology*; Laskin, A. I.,  
303 Sariaslani, S., Gadd, G. M., Eds.; Academic Press, 2008; Vol. 65, pp 249–269.  
304 [https://doi.org/10.1016/S0065-2164\(08\)00609-6](https://doi.org/10.1016/S0065-2164(08)00609-6).
- 305 (3) Brouwer, A. F.; Eisenberg, J. N. S.; Pomeroy, C. D.; Shulman, L. M.; Hindiyeh, M.; Manor,  
306 Y.; Grotto, I.; Koopman, J. S.; Eisenberg, M. C. Epidemiology of the Silent Polio Outbreak  
307 in Rahat, Israel, Based on Modeling of Environmental Surveillance Data. *Proc Natl Acad*  
308 *Sci USA* **2018**, *115* (45), E10625. <https://doi.org/10.1073/pnas.1808798115>.
- 309 (4) Kazama, S.; Miura, T.; Masago, Y.; Konta, Y.; Tohma, K.; Manaka, T.; Liu, X.; Nakayama,  
310 D.; Tanno, T.; Saito, M.; Oshitani, H.; Omura, T. Environmental Surveillance of Norovirus  
311 Genogroups I and II for Sensitive Detection of Epidemic Variants. *Applied and*  
312 *Environmental Microbiology* **2017**. <https://doi.org/10.1128/AEM.03406-16>.
- 313 (5) McCall, C.; Wu, H.; Miyani, B.; Xagorarakis, I. Identification of Multiple Potential Viral  
314 Diseases in a Large Urban Center Using Wastewater Surveillance. *Water Research* **2020**,  
315 *184*, 116160. <https://doi.org/10.1016/j.watres.2020.116160>.
- 316 (6) Wu, F.; Zhang, J.; Xiao, A.; Gu, X.; Lee, W. L.; Armas, F.; Kauffman, K.; Hanage, W.;  
317 Matus, M.; Ghaeli, N.; Endo, N.; Duvallet, C.; Poyet, M.; Moniz, K.; Washburne, A. D.;  
318 Erickson, T. B.; Chai, P. R.; Thompson, J.; Alm, E. J. SARS-CoV-2 Titers in Wastewater  
319 Are Higher than Expected from Clinically Confirmed Cases. *mSystems* **2020**, *5* (4),  
320 e00614-20. <https://doi.org/10.1128/mSystems.00614-20>.
- 321 (7) Feng, S.; Roguet, A.; McClary-Gutierrez, J. S.; Newton, R. J.; Kloczko, N.; Meiman, J. G.;  
322 McLellan, S. L. Evaluation of Sampling, Analysis, and Normalization Methods for SARS-  
323 CoV-2 Concentrations in Wastewater to Assess COVID-19 Burdens in Wisconsin  
324 Communities. *ACS ES&T Water* **2021**, *1* (8), 1955–1965.  
325 <https://doi.org/10.1021/acsestwater.1c00160>.
- 326 (8) Fernandez-Cassi, X.; Scheidegger, A.; Bänziger, C.; Cariti, F.; Corzon, A. T.;  
327 Ganesanandamoorthy, P.; Lemaitre, J. C.; Ort, C.; Julian, T. R.; Kohn, T. Wastewater  
328 Monitoring Outperforms Case Numbers as a Tool to Track COVID-19 Incidence Dynamics  
329 When Test Positivity Rates Are High. *Water Research* **2021**, 117252.  
330 <https://doi.org/10.1016/j.watres.2021.117252>.
- 331 (9) Wolfe, M. K.; Archana, A.; Catoe, D.; Coffman, M. M.; Dorevich, S.; Graham, K. E.; Kim,  
332 S.; Grijalva, L. M.; Roldan-Hernandez, L.; Silverman, A. I.; Sinnott-Armstrong, N.; Vugia, D.  
333 J.; Yu, A. T.; Zambrana, W.; Wigginton, K. R.; Boehm, A. B. Scaling of SARS-CoV-2 RNA  
334 in Settled Solids from Multiple Wastewater Treatment Plants to Compare Incidence Rates  
335 of Laboratory-Confirmed COVID-19 in Their Sewersheds. *Environ. Sci. Technol. Lett.*  
336 **2021**. <https://doi.org/10.1021/acs.estlett.1c00184>.
- 337 (10) Peccia, J.; Zulli, A.; Brackney, D. E.; Grubaugh, N. D.; Kaplan, E. H.; Casanovas-Massana,  
338 A.; Ko, A. I.; Malik, A. A.; Wang, D.; Wang, M.; Warren, J. L.; Weinberger, D. M.; Omer, S.  
339 B. SARS-CoV-2 RNA Concentrations in Primary Municipal Sewage Sludge as a Leading  
340 Indicator of COVID-19 Outbreak Dynamics. *Nature Biotechnology* **2020**, *38*, 1164–1167.
- 341 (11) D’Aoust, P. M.; Mercier, E.; Montpetit, D.; Jia, J.-J.; Alexandrov, I.; Neault, N.; Baig, A. T.;

- 342 Mayne, J.; Zhang, X.; Alain, T.; Langlois, M.-A.; Servos, M. R.; MacKenzie, M.; Figeys, D.;  
343 MacKenzie, A. E.; Graber, T. E.; Delatolla, R. Quantitative Analysis of SARS-CoV-2 RNA  
344 from Wastewater Solids in Communities with Low COVID-19 Incidence and Prevalence.  
345 *Water Research* **2021**, *188*, 116560. <https://doi.org/10.1016/j.watres.2020.116560>.
- 346 (12) Wölfel, R.; Corman, V. M.; Guggemos, W.; Seilmaier, M.; Zange, S.; Müller, M. A.;  
347 Niemeyer, D.; Jones, T. C.; Vollmar, P.; Rothe, C.; Hoelscher, M.; Bleicker, T.; Brünink, S.;  
348 Schneider, J.; Ehmann, R.; Zwirgmaier, K.; Drosten, C.; Wendtner, C. Virological  
349 Assessment of Hospitalized Patients with COVID-2019. *Nature* **2020**, *581* (7809), 465–  
350 469. <https://doi.org/10.1038/s41586-020-2196-x>.
- 351 (13) Natarajan, A.; Han, A.; Zlitni, S.; Brooks, E. F.; Vance, S. E.; Wolfe, M.; Singh, U.;  
352 Jagannathan, P.; Pinsky, B. A.; Boehm, A.; Bhatt, A. S. Standardized Preservation,  
353 Extraction and Quantification Techniques for Detection of Fecal SARS-CoV-2 RNA. *Nature*  
354 *Communications* **2021**, *12* (1), 5753. <https://doi.org/10.1038/s41467-021-25576-6>.
- 355 (14) Zhang, Y.; Cen, M.; Hu, M.; Du, L.; Hu, W.; Kim, J. J.; Dai, N. Prevalence and Persistent  
356 Shedding of Fecal SARS-CoV-2 RNA in Patients With COVID-19 Infection: A Systematic  
357 Review and Meta-Analysis. *Clin Transl Gastroenterol* **2021**, *12* (4), e00343–e00343.  
358 <https://doi.org/10.14309/ctg.0000000000000343>.
- 359 (15) Rose, E. B. Respiratory Syncytial Virus Seasonality — United States, 2014–2017. *MMWR*  
360 *Morb Mortal Wkly Rep* **2018**, *67*. <https://doi.org/10.15585/mmwr.mm6702a4>.
- 361 (16) HAN Archive - 00443 | Health Alert Network (HAN)  
362 <https://emergency.cdc.gov/han/2021/han00443.asp> (accessed 2021 -11 -24).
- 363 (17) Fenton, C.; Scott, L. J.; Plosker, G. L. Palivizumab: A Review of Its Use as Prophylaxis for  
364 Serious Respiratory Syncytial Virus Infection. *Paediatr Drugs* **2004**, *6* (3), 177–197.  
365 <https://doi.org/10.2165/00148581-200406030-00004>.
- 366 (18) von Linstow, M.-L.; Eugen-Olsen, J.; Koch, A.; Winther, T.; Westh, H.; Høgh, B. Excretion  
367 Patterns of Human Metapneumovirus and Respiratory Syncytial Virus among Young  
368 Children. *Eur J Med Res* **2006**, *11* (8), 329–335.
- 369 (19) Akbari, A.; Mohammadi, J.; Sadeghi, K.; Azizi Jalilian, F. Identification of Respiratory  
370 Syncytial Virus (RSV) Genome in the Stool of a Child with Acute Gastroenteritis. *Iranian*  
371 *Journal of Virology* **2017**, *11* (4), 39–41.
- 372 (20) Ye, Y.; Ellenberg, R. M.; Graham, K. E.; Wigginton, K. R. Survivability, Partitioning, and  
373 Recovery of Enveloped Viruses in Untreated Municipal Wastewater. *Environ. Sci. Technol.*  
374 **2016**, *50* (10), 5077–5085. <https://doi.org/10.1021/acs.est.6b00876>.
- 375 (21) Graham, K. E.; Loeb, S. K.; Wolfe, M. K.; Catoe, D.; Sinnott-Armstrong, N.; Kim, S.;  
376 Yamahara, K. M.; Sassoubre, L. M.; Mendoza Grijalva, L. M.; Roldan-Hernandez, L.;  
377 Langenfeld, K.; Wigginton, K. R.; Boehm, A. B. SARS-CoV-2 RNA in Wastewater Settled  
378 Solids Is Associated with COVID-19 Cases in a Large Urban Sewershed. *Environ. Sci.*  
379 *Technol.* **2021**, *55* (1), 488–498. <https://doi.org/10.1021/acs.est.0c06191>.
- 380 (22) Wolfe, M. K.; Topol, A.; Knudson, A.; Simpson, A.; White, B.; Duc, V.; Yu, A.; Li, L.; Balliet,  
381 M.; Stoddard, P.; Han, G.; Wigginton, K. R.; Boehm, A. High-Frequency, High-Throughput  
382 Quantification of SARS-CoV-2 RNA in Wastewater Settled Solids at Eight Publicly Owned  
383 Treatment Works in Northern California Shows Strong Association with COVID-19  
384 Incidence. *mSystems* **2021**, *0* (0), e00829-21. <https://doi.org/10.1128/mSystems.00829-21>.
- 385 (23) California Influenza Surveillance Program. *Influenza and Other Respiratory Viruses*  
386 *Weekly Report*; 2021.
- 387 (24) Topol, A.; Wolfe, M.; Wigginton, K.; White, B.; Boehm, A. High Throughput RNA Extraction  
388 and PCR Inhibitor Removal of Settled Solids for Wastewater Surveillance of SARS-CoV-2  
389 RNA. *protocols.io* **2021**.
- 390 (25) Topol, A.; Wolfe, M.; White, B.; Wigginton, K.; Boehm, A. High Throughput Pre-Analytical  
391 Processing of Wastewater Settled Solids for SARS-CoV-2 RNA Analyses. *protocols.io*  
392 **2021**.

- 393 (26) Topol, A.; Wolfe, M.; White, B.; Wigginton, K.; Boehm, A. High Throughput SARS-COV-2,  
394 PMMOV, and BCoV Quantification in Settled Solids Using Digital RT-PCR. *protocols.io*  
395 **2021**.
- 396 (27) Kitajima, M.; Sassi, H. P.; Torrey, J. R. Pepper Mild Mottle Virus as a Water Quality  
397 Indicator. *npj Clean Water* **2018**, 1 (1), 19. <https://doi.org/10.1038/s41545-018-0019-5>.
- 398 (28) Symonds, E. M.; Nguyen, K. H.; Harwood, V. J.; Breitbart, M. Pepper Mild Mottle Virus: A  
399 Plant Pathogen with a Greater Purpose in (Waste)Water Treatment Development and  
400 Public Health Management. *Water Research* **2018**, 144, 1–12.  
401 <https://doi.org/10.1016/j.watres.2018.06.066>.
- 402 (29) McClary-Gutierrez, J. S.; Aanderud, Z. T.; Al-faliti, M.; Duvallet, C.; Gonzalez, R.; Guzman,  
403 J.; Holm, R. H.; Jahne, M. A.; Kantor, R. S.; Katsivelis, P.; Kuhn, K. G.; Langan, L. M.;  
404 Mansfeldt, C.; McLellan, S. L.; Mendoza Grijalva, L. M.; Murnane, K. S.; Naughton, C. C.;  
405 Packman, A. I.; Paraskevopoulos, S.; Radniecki, T. S.; Roman, F. A.; Shrestha, A.;  
406 Stadler, L. B.; Steele, J. A.; Swalla, B. M.; Vikesland, P.; Wartell, B.; Wilusz, C. J.; Wong,  
407 J. C. C.; Boehm, A. B.; Halden, R. U.; Bibby, K.; Delgado Vela, J. Standardizing Data  
408 Reporting in the Research Community to Enhance the Utility of Open Data for SARS-CoV-  
409 2 Wastewater Surveillance. *Environ. Sci.: Water Res. Technol.* **2021**, 7 (9), 1545–1551.  
410 <https://doi.org/10.1039/D1EW00235J>.
- 411 (30) The dMIQE Group; Huggett, J. F. The Digital MIQE Guidelines Update: Minimum  
412 Information for Publication of Quantitative Digital PCR Experiments for 2020. *Clinical*  
413 *Chemistry* **2020**, 66 (8), 1012–1029. <https://doi.org/10.1093/clinchem/hvaa125>.
- 414 (31) Borchardt, M. A.; Boehm, A. B.; Salit, M.; Spencer, S. K.; Wigginton, K. R.; Noble, R. T.  
415 The Environmental Microbiology Minimum Information (EMMI) Guidelines: QPCR and  
416 DPCR Quality and Reporting for Environmental Microbiology. *Environ. Sci. Technol.* **2021**,  
417 55 (15), 10210–10223. <https://doi.org/10.1021/acs.est.1c01767>.
- 418 (32) Simpson, A.; Topol, A.; White, B.; Wolfe, M. K.; Wigginton, K.; Boehm, A. B. Effect of  
419 Storage Conditions on SARS-CoV-2 RNA Quantification in Wastewater Solids. *PeerJ*  
420 **2021**, 9, e11933. <https://doi.org/10.7717/peerj.11933>.

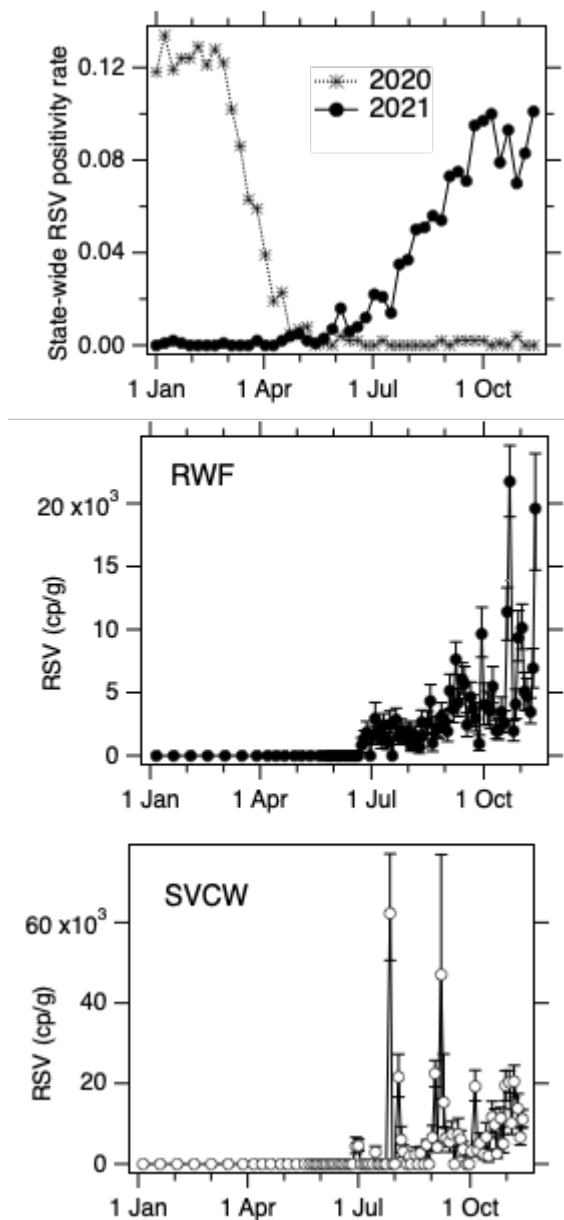

421  
422 Figure 1. Concentrations of RSV RNA (units of copies per g dry weight) measured in settled solids at RWF  
423 and SVCW POTWs in 2021 as well as the percent of clinical samples from sentinel laboratories testing  
424 positive for RSV across the state of California in 2020 and 2021 (positivity rate). Error bars on the  
425 wastewater measurements represent standard deviations as total errors from the ddPCR instrument  
426 software.

427  
428

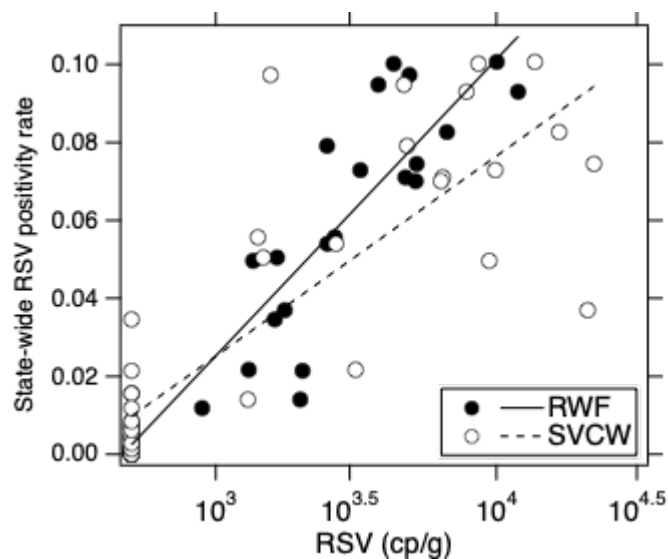

429  
430 Figure 2. Weekly state-wide RSV positivity rate at sentinel laboratories versus weekly average RSV  
431 concentrations in wastewater settled solids at two POTW. Linear curve fit between  $\log_{10}$ -transformed  
432 concentrations and positivity rate is shown for both POTWs. Samples with RSV that are non-detect are  
433 shown with a value of 500 cp/g.  
434
